# Supplementary material
Source: PubMed Central journal article supplement (PMC3732447)
Supplement: NIHMS486729-supplement-Suupplement_Table_1.pdf [file NIHMS486729-supplement-Suupplement_Table_1.pdf]

**Supplementary Table 1** Characteristics of six control and six gluten-sensitive rhesus macaques used in this study

| n  | Animal Tag | Age <sup>a</sup> | Sex <sup>b</sup> | <i>M. mulatta</i> subspecies | <i>Mamu-DQA1</i> *    | <i>Mamu-DQB1</i> * | Response to Dietary Gluten |     |          |                            |
|----|------------|------------------|------------------|------------------------------|-----------------------|--------------------|----------------------------|-----|----------|----------------------------|
|    |            |                  |                  |                              |                       |                    | AGA                        | TG2 | Clinical | Enteritis, VA <sup>c</sup> |
| 1  | HI48       | 3.0              | M                | Indian                       | NA <sup>d</sup>       | NA                 | -                          | -   | -        | -                          |
| 2  | HK31       | 3.5              | M                | Indian                       | NA                    | NA                 | -                          | -   | -        | -                          |
| 3  | JA99       | 2                | M                | Indian                       | NA                    | NA                 | -                          | -   | -        | -                          |
| 4  | JF24       | 2                | F                | Indian                       | NA                    | NA                 | -                          | -   | -        | -                          |
| 5  | CA18       | 12               | F                | Indian                       | NA                    | NA                 | -                          | -   | -        | -                          |
| 6  | JC16       | 2                | F                | Indian                       | NA                    | NA                 | -                          | -   | -        | -                          |
| 7  | HD13       | 1.5              | M                | Indian                       | <i>01:04</i>          | <i>06:01</i>       | +                          | +++ | +        | ++                         |
| 8  | HB72       | 5                | M                | Indian                       | <i>01:04/23:01</i>    | <i>06:01/18:02</i> | +                          | +   | -        | +/-                        |
| 9  | FB97       | 6                | F                | Indian                       | <i>01:02/23:02</i>    | <i>06:05/18:04</i> | +++                        | +++ | +++      | +++                        |
| 10 | HA09       | 4.5              | M                | Indian                       | <i>01:05:01/26:02</i> | <i>06:02/18:11</i> | +                          | ++  | -        | +                          |
| 11 | DE87       | 10               | M                | Indian                       | <i>01:05:01/05:04</i> | <i>06:02/17:03</i> | +                          | +++ | -        | +                          |
| 12 | FH45       | 7.0              | F                | Indian                       | <i>01:05:01/26:01</i> | <i>06:02/18:01</i> | +++                        | +   | +++      | +++                        |

<sup>a</sup>Age is expressed in years; <sup>b</sup>M = male, F = female; <sup>c</sup>villous atrophy; <sup>d</sup>NA = Overall distribution of *Mamu II* (DQ) alleles in TG2 antibody-negative (control healthy) macaques is shown in Figure 1; Underlined alleles were found to be present in TG2 antibody-positive (gluten-sensitive) animals with significantly higher frequency ( $p=0.008$ ) than in rest of the macaques.

**Ethics statement:** Approval for veterinary procedures in this study had been obtained from the Tulane University Animal Care and Use Committee, Animal Welfare Assurance A-4499-01. Animals in this project were under the full care of veterinarians with the standards incorporated in the Guide to the Care and Use of Laboratory Animals (NIH) 78-23 (Revised, 1996).
